# Supplementary material
Source: HighWire-hosted journal article supplement (https://www.jpn.ca/highwire/filestream/89282/field_highwire_adjunct_files/0/200128-a1.pdf)
Supplement: 200128-a1.pdf [file 200128-a1.pdf]

Appendix 1 to Meyer A, Mehra L, Hajcak G. Error-related negativity predicts increases in anxiety in a sample of clinically anxious female children and adolescents over 2 years. J Psychiatry Neurosci 2021. doi: 10.1503/jpn.200128

Copyright © 2021 The Author(s) or their employer(s).

To receive this resource in an accessible format, please contact us at [cmajgroup@cmaj.ca](mailto:cmajgroup@cmaj.ca).

Online appendices are unedited and posted as supplied by the authors.

|                                  | 1.                | 2.               | 3.               | 4.               | 5.               | 6.               | 7.               | 8.               | 9.               | 10.              | 11.              | 12.              | 13.              | 14.   | 15.              | 16.   | 17.   | 18. | 19. | 20. | 21. | 22. |
|----------------------------------|-------------------|------------------|------------------|------------------|------------------|------------------|------------------|------------------|------------------|------------------|------------------|------------------|------------------|-------|------------------|-------|-------|-----|-----|-----|-----|-----|
| 1. ΔERN                          | -                 |                  |                  |                  |                  |                  |                  |                  |                  |                  |                  |                  |                  |       |                  |       |       |     |     |     |     |     |
| 2. W1. MASC Physical Symptoms    | -.01              | -                |                  |                  |                  |                  |                  |                  |                  |                  |                  |                  |                  |       |                  |       |       |     |     |     |     |     |
| 3. W1. MASC Social Anxiety       | -.05              | .78**            | -                |                  |                  |                  |                  |                  |                  |                  |                  |                  |                  |       |                  |       |       |     |     |     |     |     |
| 4. W1. MASC Separation Anxiety   | .00               | .36**            | .34**            | -                |                  |                  |                  |                  |                  |                  |                  |                  |                  |       |                  |       |       |     |     |     |     |     |
| 5. W1. MASC Harm Avoidance       | -.14              | .38**            | .46**            | .55**            | -                |                  |                  |                  |                  |                  |                  |                  |                  |       |                  |       |       |     |     |     |     |     |
| 6. W1. MASC Total Score          | -.06              | .86**            | .87**            | .67**            | .72**            | -                |                  |                  |                  |                  |                  |                  |                  |       |                  |       |       |     |     |     |     |     |
| 7. W1. SCARED Panic              | -.09              | .81**            | .60**            | .24 <sup>†</sup> | .35**            | .68**            | -                |                  |                  |                  |                  |                  |                  |       |                  |       |       |     |     |     |     |     |
| 8. W1. SCARED GAD                | -.14              | .67**            | .65**            | .29 <sup>†</sup> | .38**            | .67**            | .63**            | -                |                  |                  |                  |                  |                  |       |                  |       |       |     |     |     |     |     |
| 9. W1. SCARED Separation Anxiety | .16               | .33 <sup>†</sup> | .20              | .64**            | .14              | .40**            | .27 <sup>†</sup> | .20 <sup>†</sup> | -                |                  |                  |                  |                  |       |                  |       |       |     |     |     |     |     |
| 10. W1. SCARED Social Anxiety    | .09               | .49**            | .65**            | .40**            | .31 <sup>†</sup> | .60**            | .44**            | .42**            | .18              | -                |                  |                  |                  |       |                  |       |       |     |     |     |     |     |
| 11. W1. SCARED School Avoidance  | .08               | .68**            | .55**            | .21 <sup>†</sup> | .07              | .53**            | .55**            | .58**            | .41**            | .33 <sup>†</sup> | -                |                  |                  |       |                  |       |       |     |     |     |     |     |
| 12. W1. SCARED Total Score       | -.01              | .84**            | .75**            | .47**            | .39**            | .81**            | .85**            | .83**            | .50**            | .67**            | .73**            | -                |                  |       |                  |       |       |     |     |     |     |     |
| 13. W2. MASC Physical Symptoms   | -.18              | .48**            | .36 <sup>†</sup> | .14              | .21 <sup>†</sup> | .40**            | .47**            | .44**            | .22 <sup>†</sup> | .36 <sup>†</sup> | .43**            | .54**            | -                |       |                  |       |       |     |     |     |     |     |
| 14. W2. MASC Social Anxiety      | -.26 <sup>†</sup> | .39**            | .43**            | .22              | .09              | .38**            | .28 <sup>†</sup> | .36 <sup>†</sup> | .16              | .54**            | .36 <sup>†</sup> | .46**            | .67**            | -     |                  |       |       |     |     |     |     |     |
| 15. W2. MASC Separation Anxiety  | -.13              | .20              | .13              | .65**            | .25 <sup>†</sup> | .35 <sup>†</sup> | .14              | -.00             | .40**            | .37**            | .03              | .24 <sup>†</sup> | .29 <sup>†</sup> | .44** | -                |       |       |     |     |     |     |     |
| 16. W2. MASC Harm Avoidance      | -.30 <sup>†</sup> | .18              | .28 <sup>†</sup> | .23 <sup>†</sup> | .51**            | .36 <sup>†</sup> | .19              | .22 <sup>†</sup> | .10              | .40**            | .05              | .28 <sup>†</sup> | .50**            | .53** | .33 <sup>†</sup> | -     |       |     |     |     |     |     |
| 17. W2. MASC Total Score         | -.27 <sup>†</sup> | .43**            | .40**            | .36 <sup>†</sup> | .30 <sup>†</sup> | .48**            | .37 <sup>†</sup> | .36 <sup>†</sup> | .27 <sup>†</sup> | .54**            | .32 <sup>†</sup> | .51**            | .85**            | .89** | .61**            | .72** | -     |     |     |     |     |     |
| 18. W2. SCARED Panic             | -.15              | .58**            | .47**            | .23 <sup>†</sup> | .35 <sup>†</sup> | .54**            | .65**            | .50**            | .19              | .46**            | .42**            | .64**            | .81**            | .56** | .24 <sup>†</sup> | .49** | .71** | -   |     |     |     |     |

Appendix 1 to Meyer A, Mehra L, Hajcak G. Error-related negativity predicts increases in anxiety in a sample of clinically anxious female children and adolescents over 2 years. J Psychiatry Neurosci 2021. doi: 10.1503/jpn.200128

Copyright © 2021 The Author(s) or their employer(s).

To receive this resource in an accessible format, please contact us at [cmajgroup@cmaj.ca](mailto:cmajgroup@cmaj.ca).

Online appendices are unedited and posted as supplied by the authors.

|                                   |                   |                  |                  |                  |                  |       |                  |                  |                  |       |                  |       |       |       |                  |                  |       |       |       |       |       |       |
|-----------------------------------|-------------------|------------------|------------------|------------------|------------------|-------|------------------|------------------|------------------|-------|------------------|-------|-------|-------|------------------|------------------|-------|-------|-------|-------|-------|-------|
| 19. W2. SCARED GAD                | -.32*             | .38**            | .32*             | .21              | .23 <sup>t</sup> | .37*  | .30*             | .59**            | .14              | .29*  | .29*             | .47** | .68** | .73** | .23 <sup>t</sup> | .52**            | .73** | .56** | -     |       |       |       |
| 20. W2. SCARED Separation Anxiety | -.11              | .33*             | .23              | .55**            | .25 <sup>t</sup> | .41** | .32*             | .17              | .45**            | .40** | .26 <sup>t</sup> | .41** | .41** | .47** | .79**            | .37*             | .63** | .49** | .37*  | -     |       |       |
| 21. W2. SCARED Social Anxiety     | -.32 <sup>t</sup> | .33*             | -.02             | .25 <sup>t</sup> | .14              | .37** | .26 <sup>t</sup> | .27 <sup>t</sup> | .13              | .67** | .18              | .42** | .54** | .85** | .43**            | .59**            | .79** | .51** | .62** | .48** | -     |       |
| 22. W2. SCARED School Avoidance   | -.10              | .33 <sup>t</sup> | .32 <sup>t</sup> | -.02             | .09              | .21   | .29*             | .15              | .13              | .21   | .38**            | .30*  | .69** | .42** | .12              | .34 <sup>t</sup> | .54** | .64** | .46** | .30*  | .31*  | -     |
| 23. W2. SCARED Total Score        | -.27 <sup>t</sup> | .53**            | .46**            | .32*             | .30*             | .52** | .50**            | .50**            | .25 <sup>t</sup> | .54** | .39**            | .62** | .83** | .81** | .44**            | .62**            | .90** | .86** | .83** | .66** | .78** | .65** |

Supplemental Table 1. A correlation matrix of all main study variables. ΔERN = subtraction-based difference score of the error-related negativity; W1 = wave 1 data collection; W2 = wave 2 data collection; MASC = Multidimensional Anxiety Scale for Children; SCARED = Screen for Child Anxiety Related Emotional Disorders; \*\*  $p < .01$ ; \*  $p < .05$ ; <sup>t</sup>  $p < .10$
